# Supplementary material
Source: Springer Nature journal article supplement (https://www.springerprofessional.de/resource/supplementary/13673_2011_15_MOESM12_ESM.pdf/11899340)

## SIVAT base - Execution time

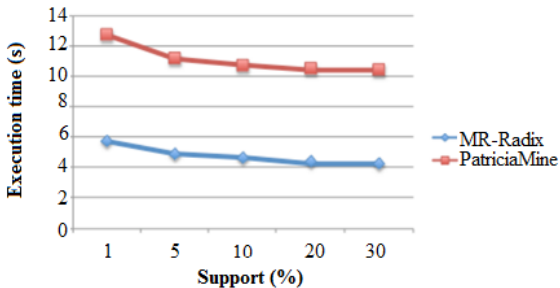

Supplement: MOESM12 [file 11899340]
